# Supplementary material for: A licensing step links AID to transcription elongation for mutagenesis in B cells
Source: PubMed Central journal article supplement (PMC5871760; doi:10.1038/s41467-018-03387-6), 2018-03-28
Supplement: 41467_2018_3387_MOESM1_ESM.pdf [file 41467_2018_3387_MOESM1_ESM.pdf]

**A licensing step links AID to transcription elongation**

**for mutagenesis in B cells**

Methot et al.

Supplementary information

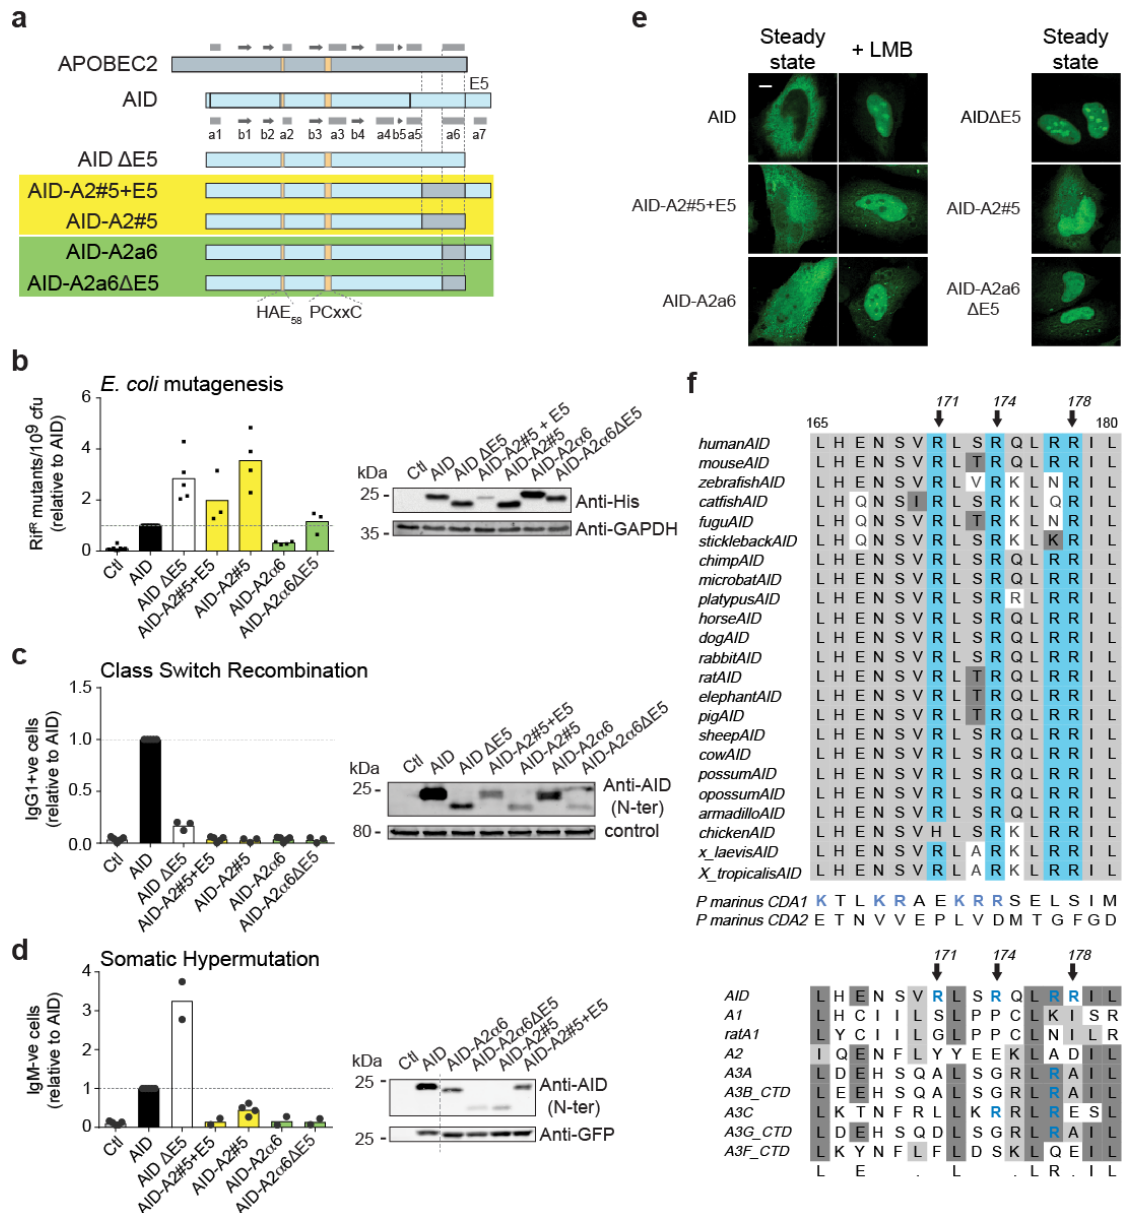

### Supplementary Figure 1. The alpha helix 6 of AID is required for biological function.

(a) Schematics of APOBEC2 (A2), AID and AID-A2 chimeras. E5 denotes the region encoded by *AICDA* exon 5. Secondary structure elements,  $\alpha$ -helices (light grey rectangles) and  $\beta$ -sheets (dark grey arrows) are identified. (b) Mutagenic activity in *E. coli* measured by the frequency of rifampicin resistant (Rif<sup>R</sup>) colonies (caused by mutations in *RpoB*) arising from cultures expressing AID or the chimeras. Means (bars) of median values (dots) obtained from 3-5 independent experiments (5 cultures/experiment) are shown, normalized to AID. (c) Class switch recombination activity in *Aicda*<sup>-/-</sup> mouse primary B cells transduced with AID or the indicated chimeras -ires-GFP and stimulated with LPS and IL-4. Means (bars) proportion of IgG1+ cells in the GFP+ population 72 h after transduction 3-5 independent experiments are shown (dots indicate values of each individual mouse), normalized to AID. (d) Somatic hypermutation activity was assayed by the relative IgM-loss accumulation in cultures of DT40 *Aicda*<sup>-/-</sup>  $\Delta\Psi V\lambda$  B cells complemented with AID or the indicated chimeras -ires-GFP. Means (bars) of the median values (dots) obtained from 2-4 independent experiments ( $\geq 12$  cultures/experiment) were normalized to the mean value of AID. In (b-d) WB of cell extracts probed with anti-AID antibody and loading control are shown on the right. For gel source data see supplementary Fig. 7. (e) Representative confocal microscopy images of HeLa cells transiently expressing AID and chimeras fused to GFP under steady state or after nuclear export inhibition with LMB (50 ng/mL, 2h). Representative of 2 independent experiments. Magnification 400X. Scale bar, 10  $\mu$ m. (f) Alignment of amino acid sequence of the region corresponding to the  $\alpha 6$  helix of AID from multiple vertebrate species (top) or the  $\alpha 6$  helix of AID and various APOBECs (bottom). Arg 171, 174 and 178 residues are indicated and basic residues at those positions are highlighted in blue.

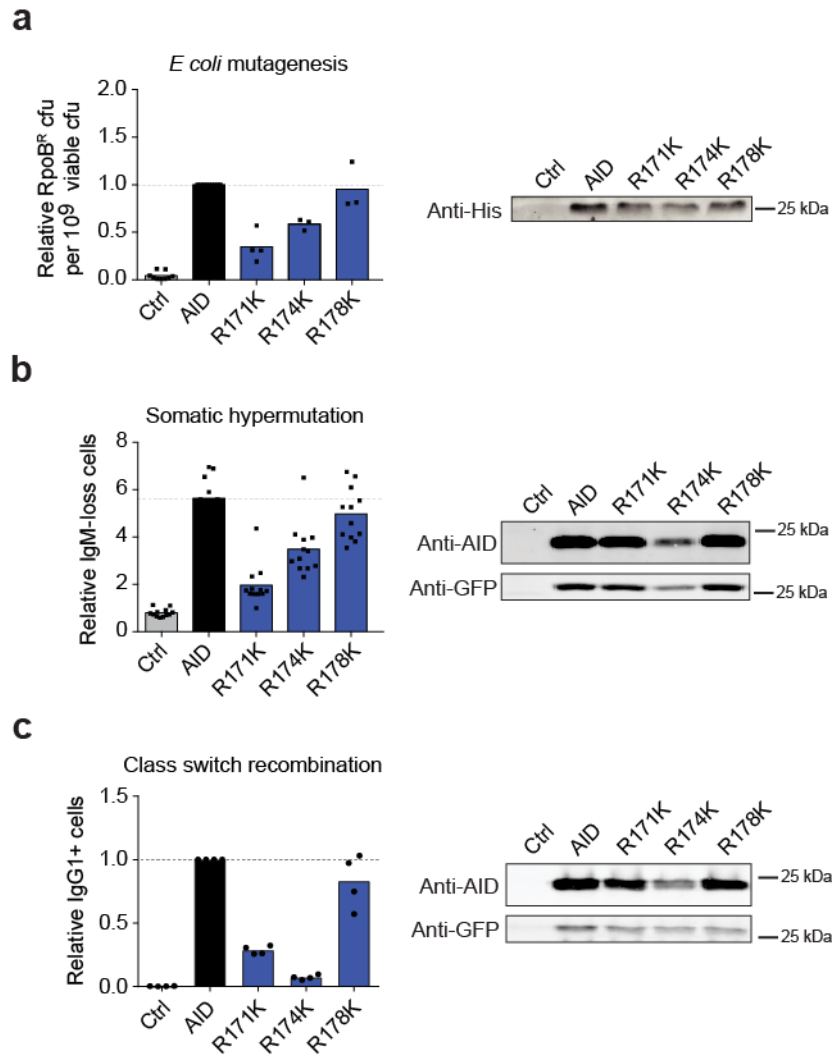

**Supplementary Figure 2. Distinct contribution of Arg 171, 174 and 178 to AID function.**

(a) Mutagenic activity in *E. coli* measured by the frequency of Rif resistant colonies arising from cultures expressing AID variants or empty vector (Ctrl). Means (bars) of median values (dots) obtained from 3-4 independent experiments (5 cultures/experiment) are shown, normalized to AID. (b) Somatic hypermutation activity was assayed by the relative IgM-loss accumulation in cultures of DT40 *Aicda*<sup>-/-</sup>  $\Delta\Psi\lambda$  B cells complemented with the indicated AID variants-ires-GFP or empty vector (Ctrl). Medians (bars) from 12 cultures/construct from 1 experiment are shown. (c) Class switch recombination activity in *Aicda*<sup>-/-</sup> mouse primary B cells complemented with the indicated AID variants-ires-GFP and stimulated with LPS and IL-4. Mean (bars) proportion of IgG1+ cells in the GFP+ population 72 h after transduction, from 2 independent experiments, with 2 mice per experiment (dots), are shown, normalized to AID. In (b-d) WB of cell extracts probed with anti-AID antibody and loading control are shown on the right. For gel source data see supplementary Fig. 7.

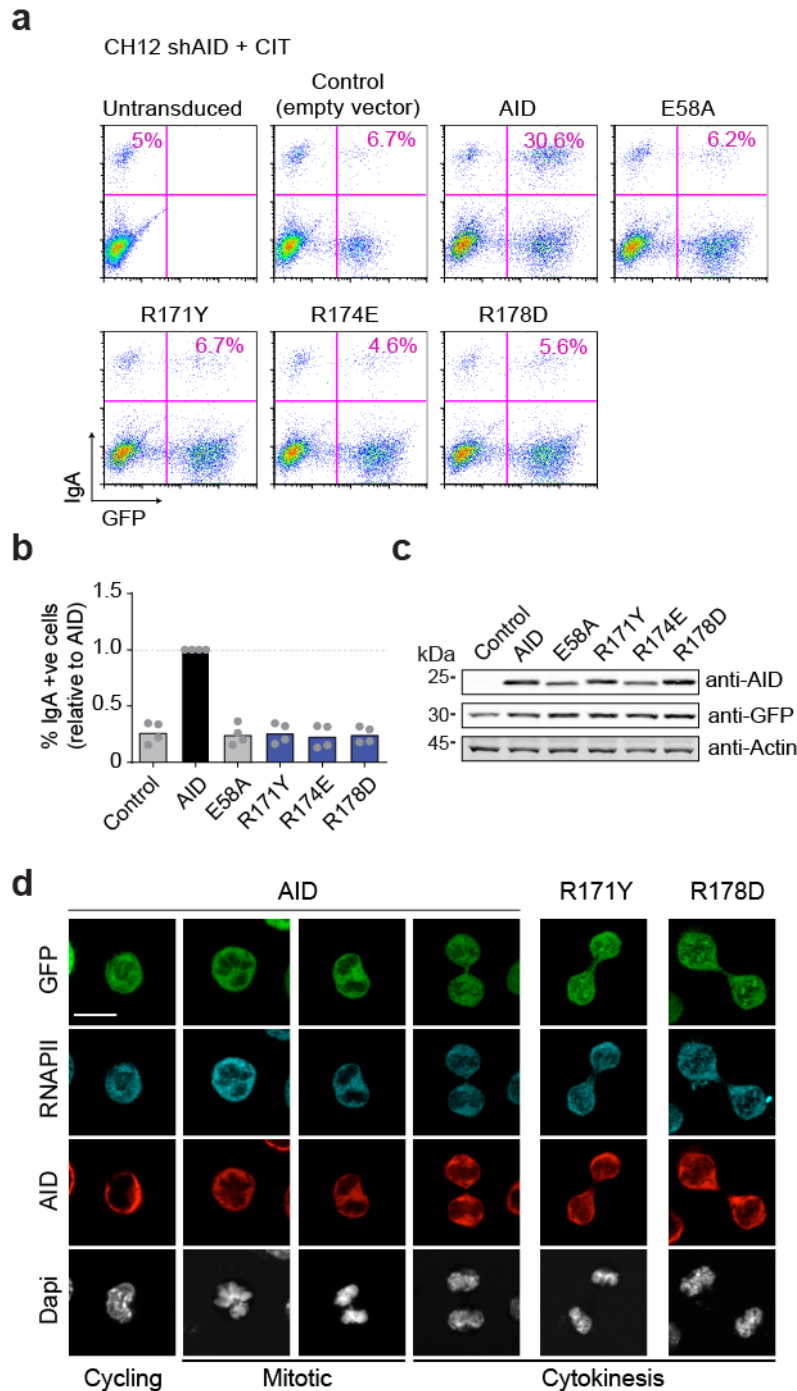

**Supplementary Figure 3. Reconstitution of AID-deficient CH12 B cells.**

(a) CH12 B cells constitutively expressing a shRNA against AID were reconstituted with AID variants by transducing with pMX-AID variant-ires-GFP. Cultures were then stimulated with CIT for 72 h to induce CSR to IgA. Representative flow cytometry plots comparing GFP infection and IgA levels in CIT-stimulated cells. The proportion of GFP+ cells that are IgA+ is indicated. (b) Means (bars) of the proportion of GFP+ cells that are IgA+ from 4 independent experiments (dots) are shown, normalized to AID. (c) Western blots of extracts from reconstituted AID-deficient CH12 B cells. GFP is used as a control of reconstitution and actin as a loading control. For gel source data see supplementary Fig. 7. (d) Confocal microscopy images of CH12 cells analysed by anti-AID and anti-RNAPII IF. Cells were determined to be cycling (G1/S/G2), mitotic or in cytokinesis based on DNA condensation and RNAPII access to the DNA. Images are representative of at least 10 different events per construct from 1 experiment. Magnification 630X. Scale bar, 10  $\mu$ m.

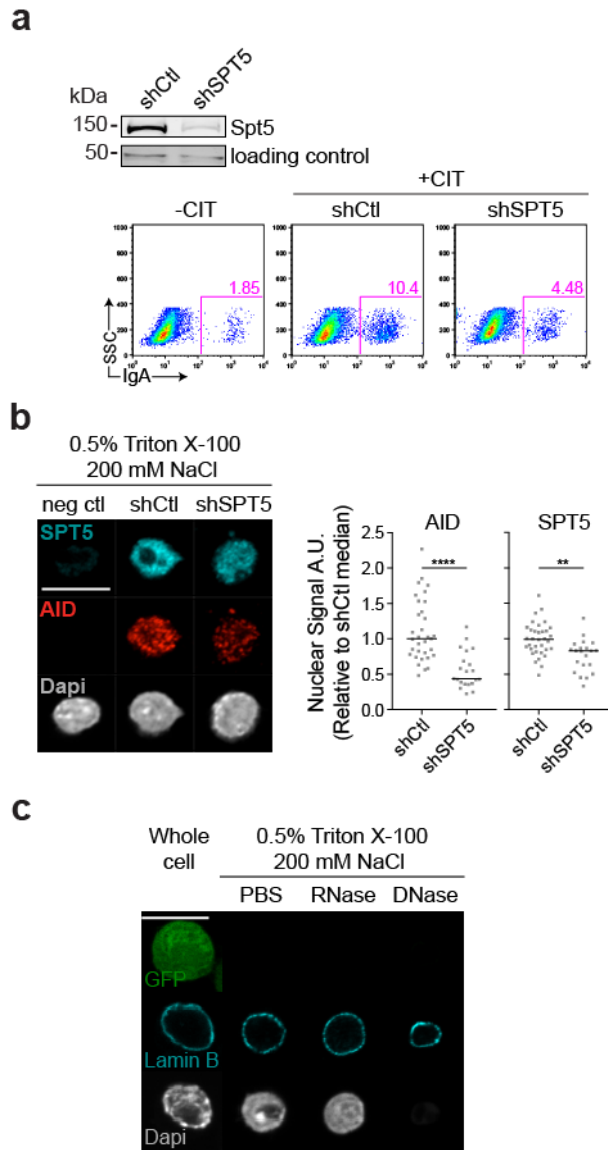

#### Supplementary Figure 4. AID chromatin association controls

(a) (Top) Western blot for Spt5 and loading control (non-specific band) from wt CH12 B cells transduced with shRNA against either luciferase (shCtl) or Spt5. (Bottom) Representative flow cytometry plots showing the proportion of IgA<sup>+</sup> cells in unstimulated cells (-CIT) or stimulated cells (+CIT) expressing each shRNA. For gel source data see supplementary Fig. 7. (b) CH12 cells expressing each shRNA were stimulated with CIT prior to nuclear wash. (Left) Confocal microscopy images of isolated nuclei analysed by anti-AID and anti-Spt5 (by IF) or DNA (Dapi). (Right) Mean AID or Spt5 signal for each nucleus (dots) and population median (bars). Significant changes in AID or Spt5 signal by unpaired, two tailed t-tests are shown (\*\* < 0.01, \*\*\*\* < 0.0001). (c) Representative confocal microscopy images of GFP, Lamin B (by IF) or DNA (Dapi) on whole cells expressing GFP control or isolated nuclei thereof. During nuclear wash, nuclei were incubated at 37°C with PBS control, RNase or DNase, as indicated. (b, c) Magnification 630X. Scale bar, 10 µm.

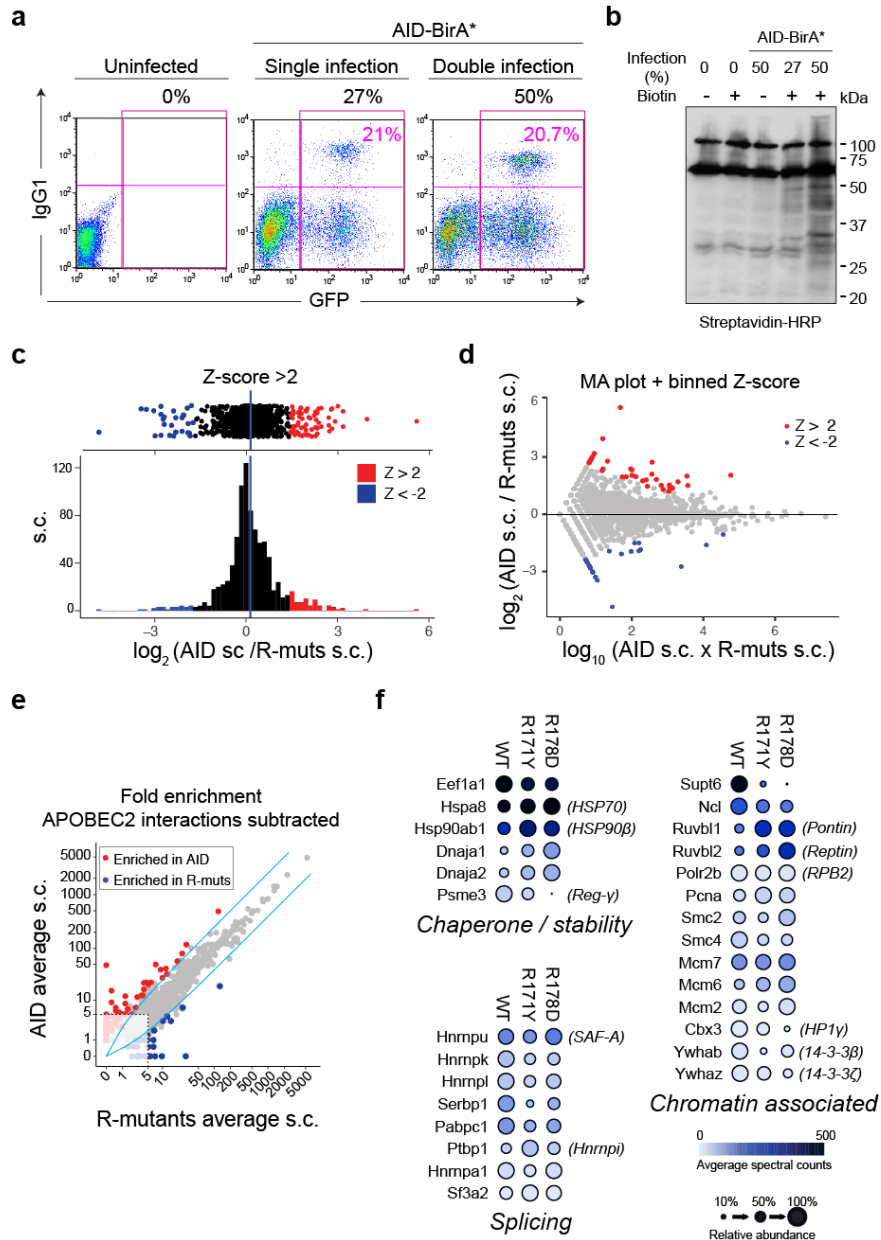

### Supplementary Figure 5. BioID controls and alternative statistical methods

(a) B cells from *Aicda*<sup>-/-</sup> mice were transduced once or twice with pMX-AID-BirA\*-ires-GFP. Representative flow cytometry plots showing the infection efficiency (above) and the relative proportions of IgG1+ in infected cells. (b) Representative western blot probed with streptavidin-HRP to detect biotinylated proteins 24h after adding biotin. Endogenous biotinylation occurs in the cells (lanes 0%), but BirA\* dependent signal is only detected when the cells are cultured with biotin (+), and is proportional to the level of infection. For gel source data see supplementary Fig. 7. (c) Z-score analysis, with positive Z-score values representing hits enriched for wt AID over R-mutants and negative values representing hits enriched for the R-mutants over wt AID. Positive hits were determined as those  $\pm 2$  SD away from the median. (d) Hits were distributed based on their overall s.c. for AID and the R-mutants, and then binned in order to run independent Z-score analysis based on overall association. Positive hits were considered as  $\pm 2$  SDs from the median. (e) Comparison of average s.c. for either wt AID or R-mutants interactions after subtracting A2 interactions. Teal lines delimit 2.5 fold changes in enrichment. Dashed box indicates hits with  $\leq 5$  s.c., which were excluded from the analysis. Interactions enriched 2.5x in AID over both R-mutants are shown in red, and those 2.5x in R-mutants over AID in blue. (f) Dot plot for multiple known AID interactions that were detected by BioID using the method described in (e). Proteins were assigned into categories based on their main function. Alternate names for certain proteins are indicated in brackets. Circle size indicates relative abundance normalized to the AID variant with the most s.c., and colour indicates actual s.c. of each factor (scales are included).

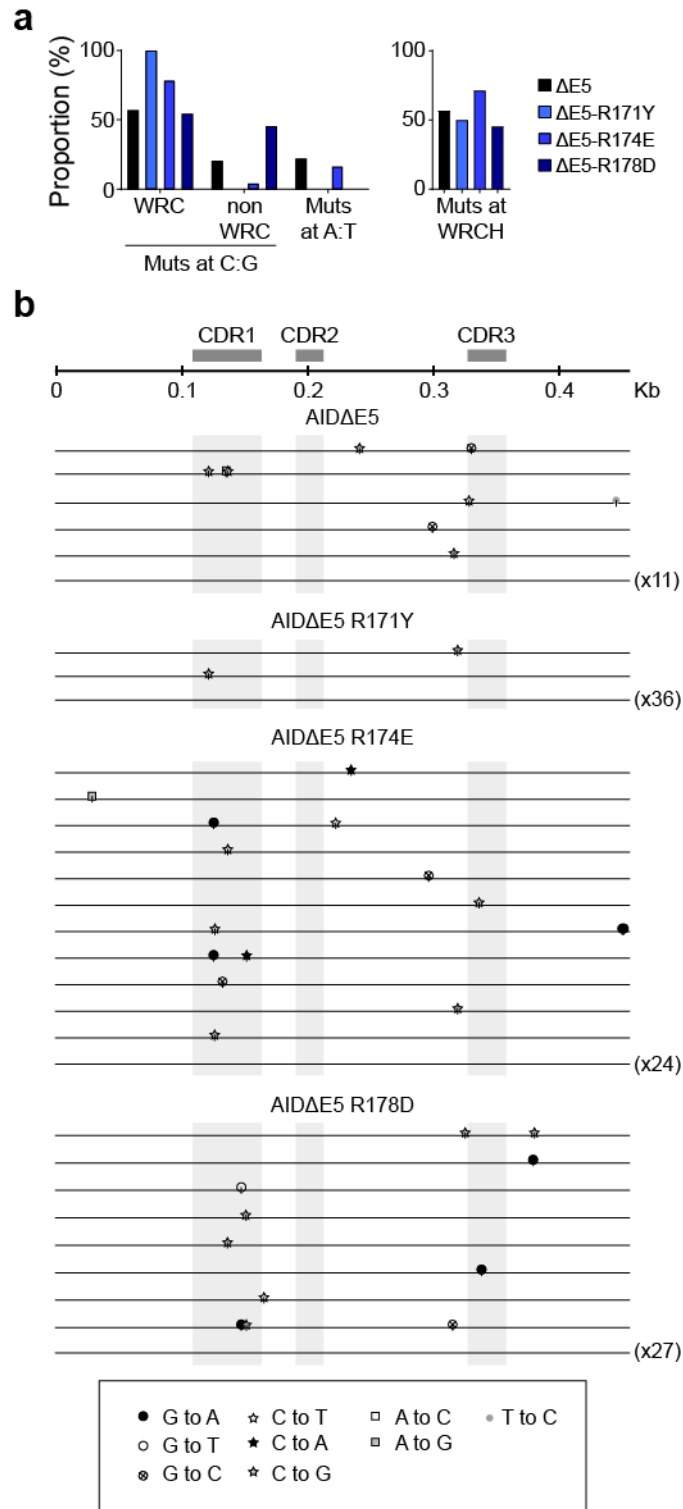

**Supplementary Figure 6. SHM at the DT40 IgV by AID $\Delta E5$  R-mutants.**

(a) Bar plots of proportion of mutations at C:G within WRC (W = A/T, R = A/G) motifs or not, or at A:T pairs (left) or within the AID preferred sequence WRCH (H = A/C/T) (right). (b) (Top) Schematic of the IgV region sequenced, with CDR regions highlighted. (Middle) Scheme of individual sequences analyse with mutations indicated (data used for Fig. 8g). CDRs highlighted to indicate the normal distribution of SHM by the R-mutants.

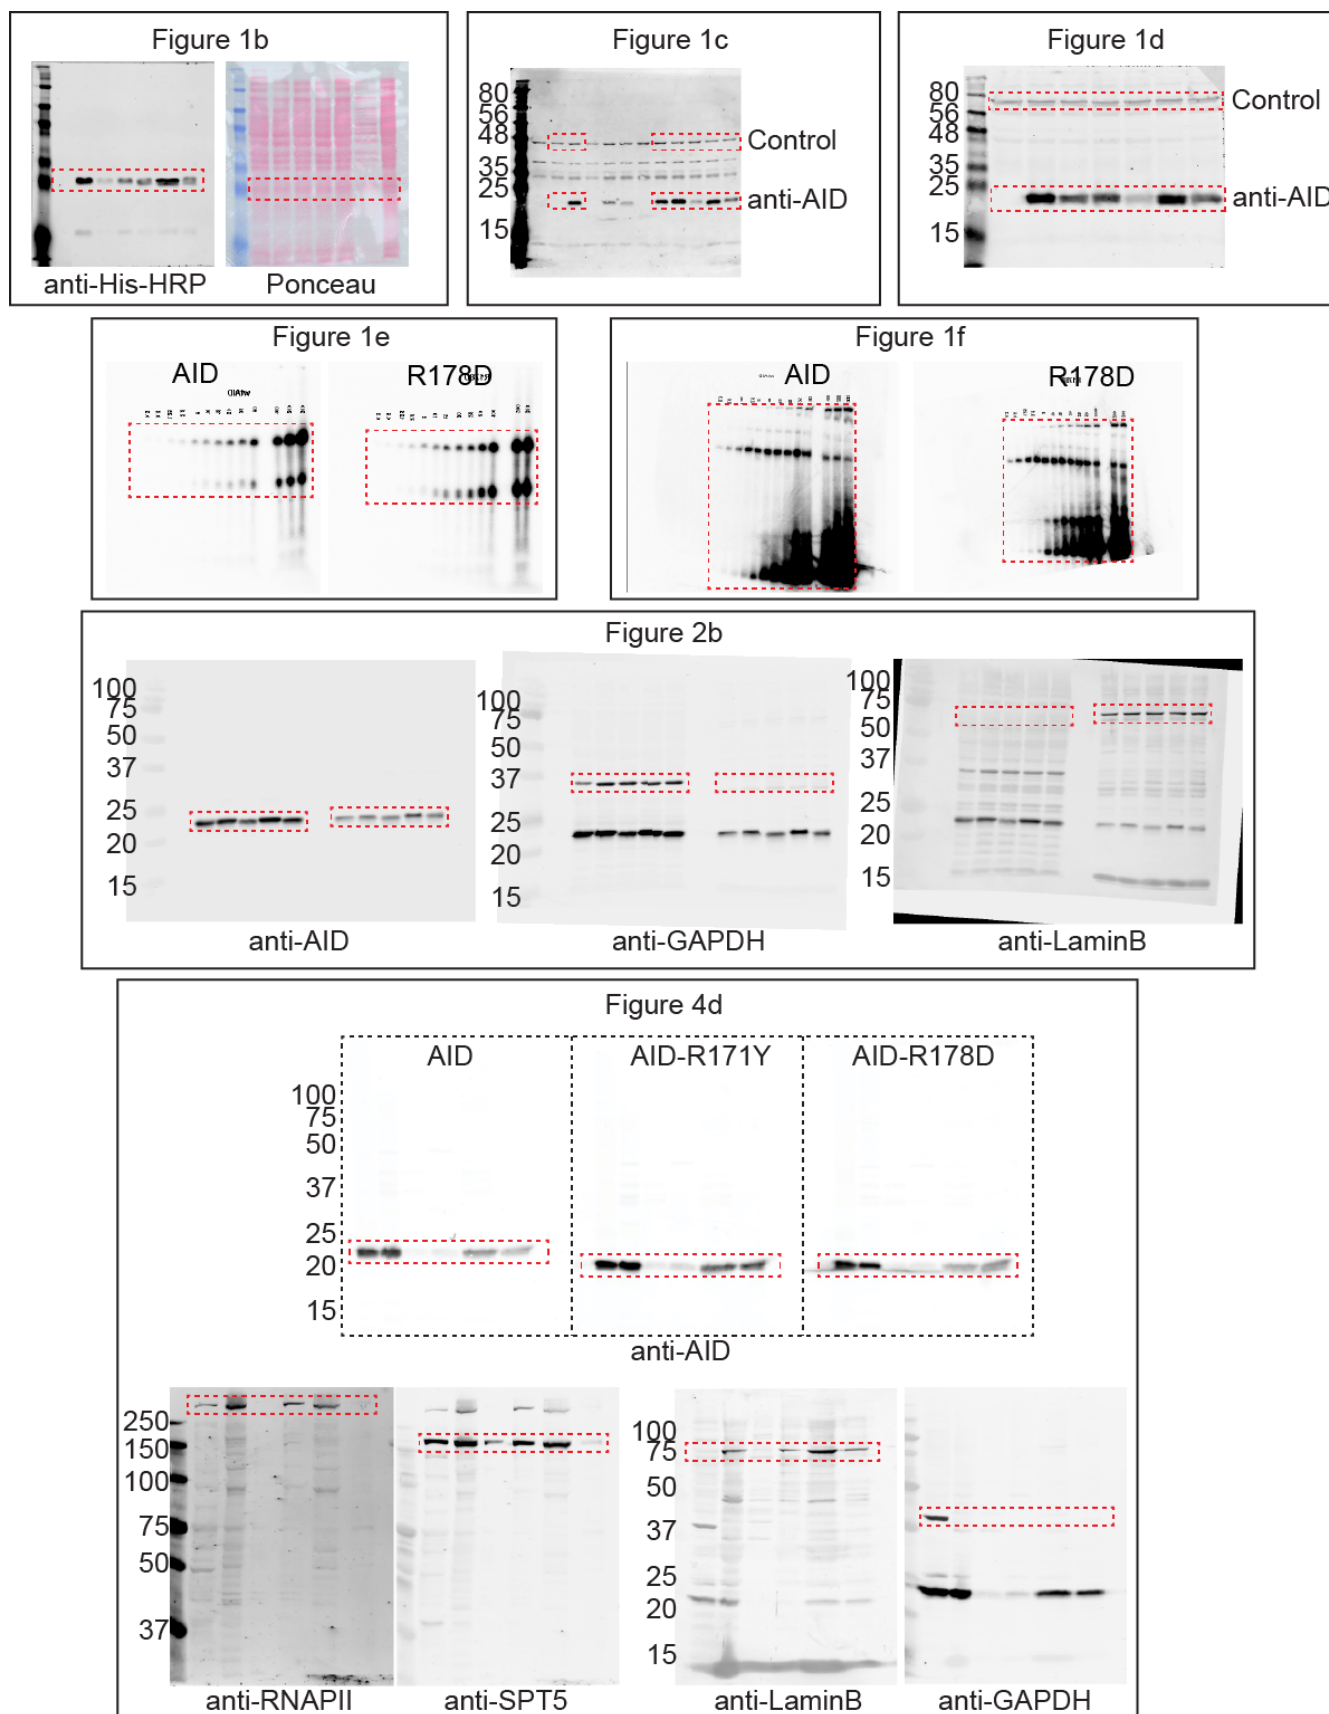

**Supplementary Figure S7. Uncropped Western Blots.**

Uncropped images of all WBs, with dashed, red boxes indicating cropping used.



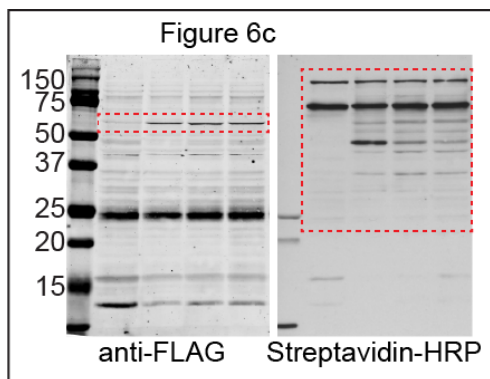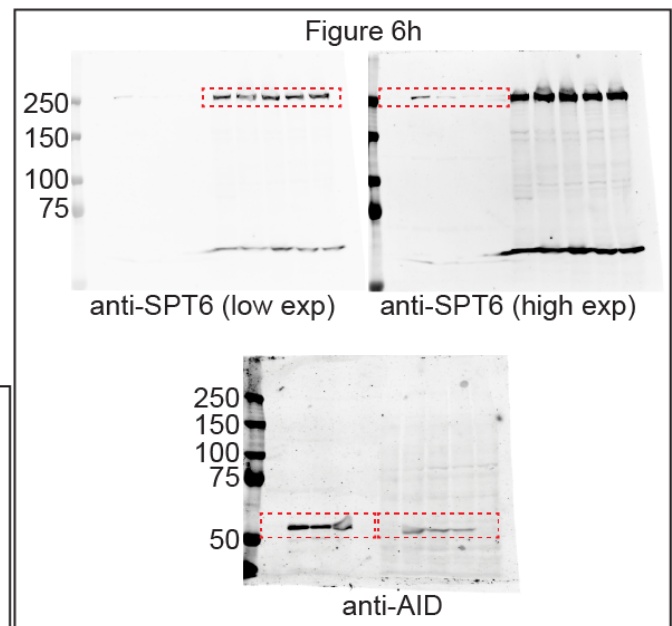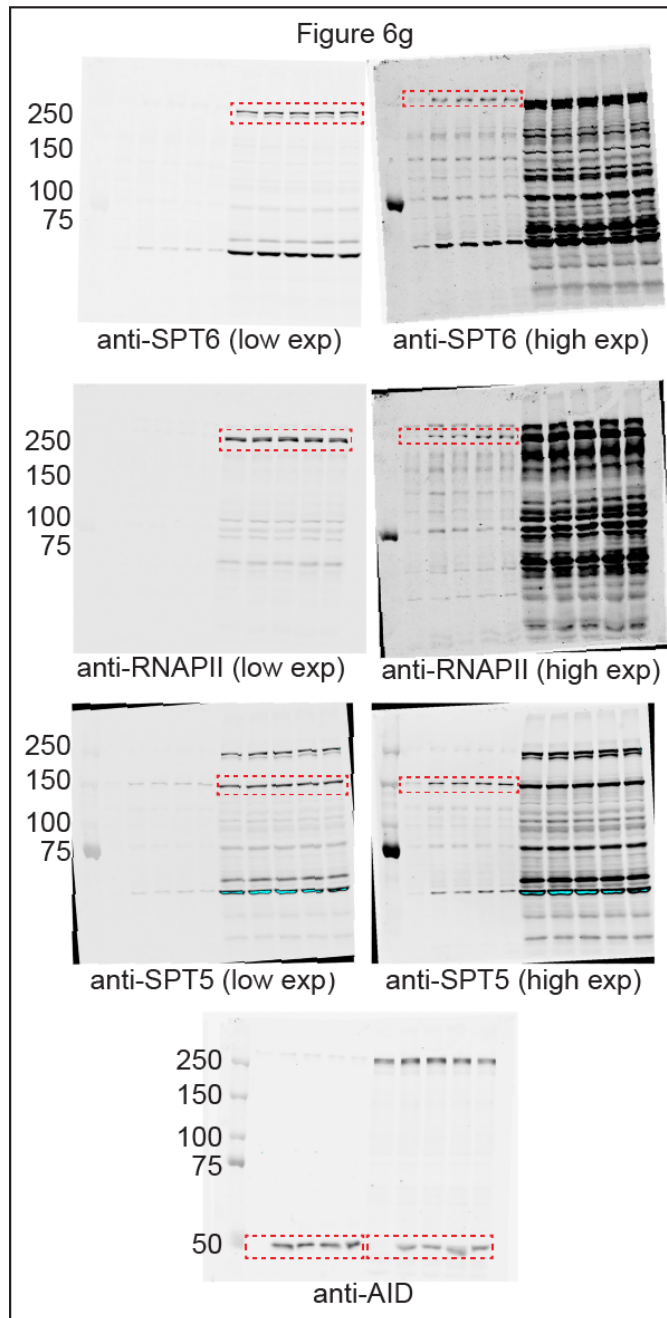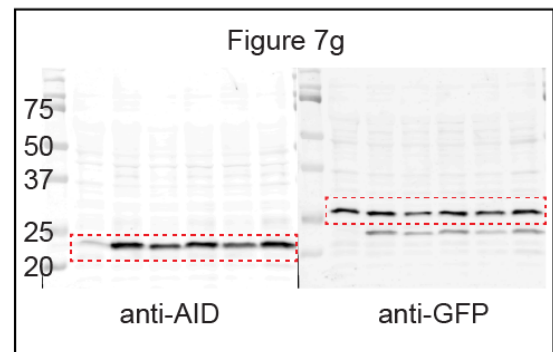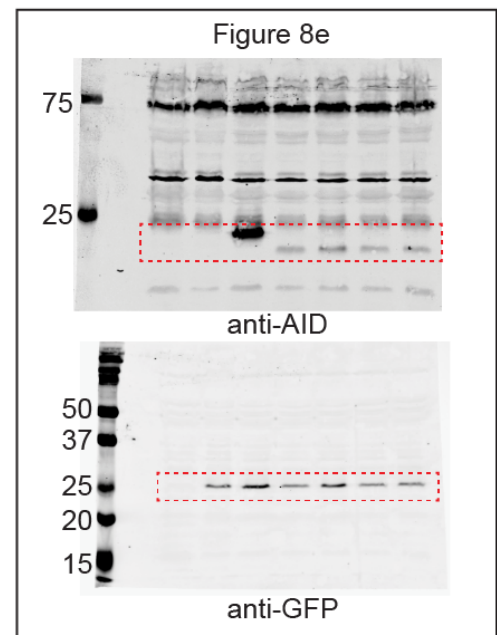

**Supplementary Figure S7. Uncropped Western Blots (cont).**

Uncropped images of all WBs, with dashed, red boxes indicating cropping used.

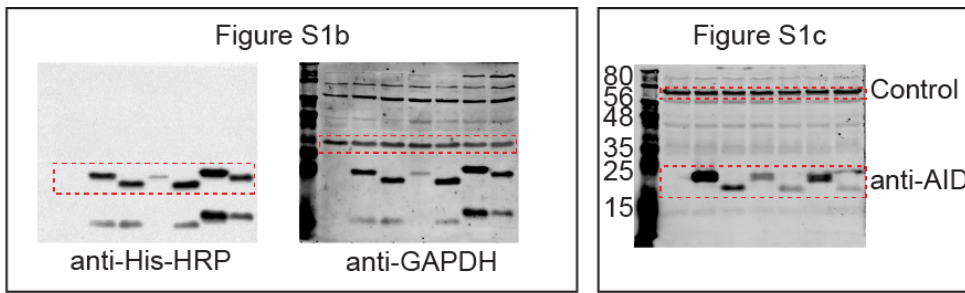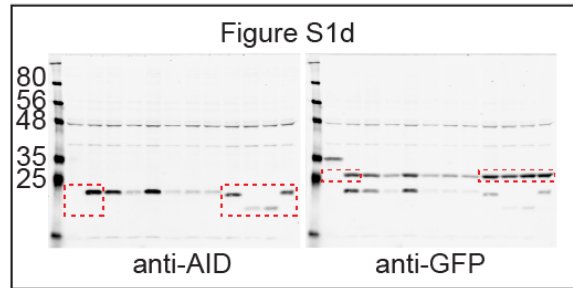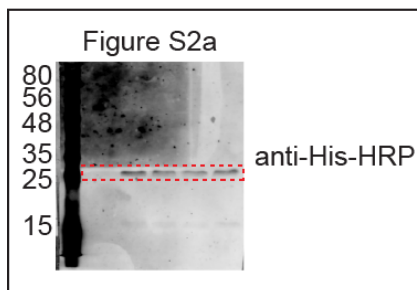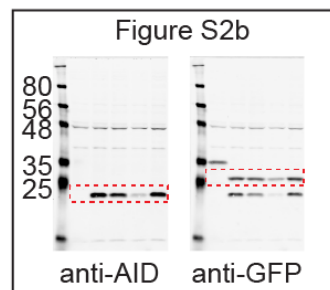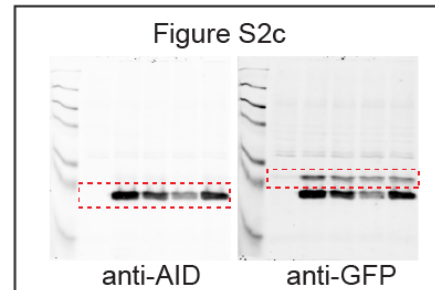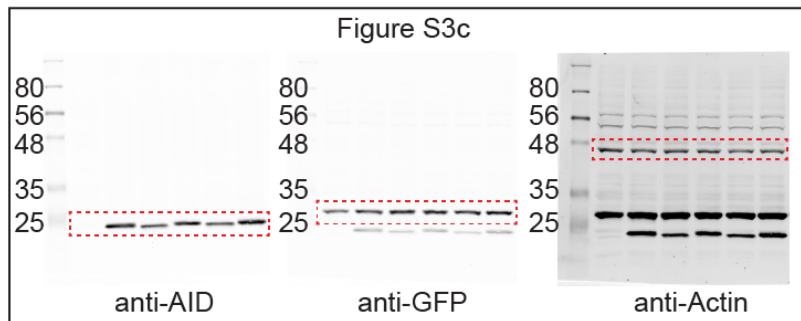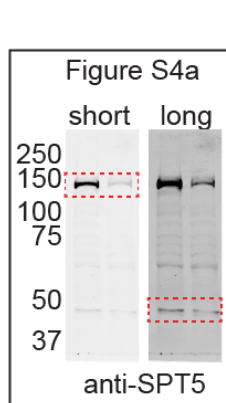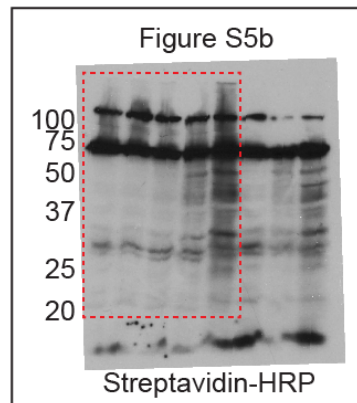

**Supplementary Figure S7. Uncropped Western Blots (cont).**

Uncropped images of all WBs, with dashed, red boxes indicating cropping used.

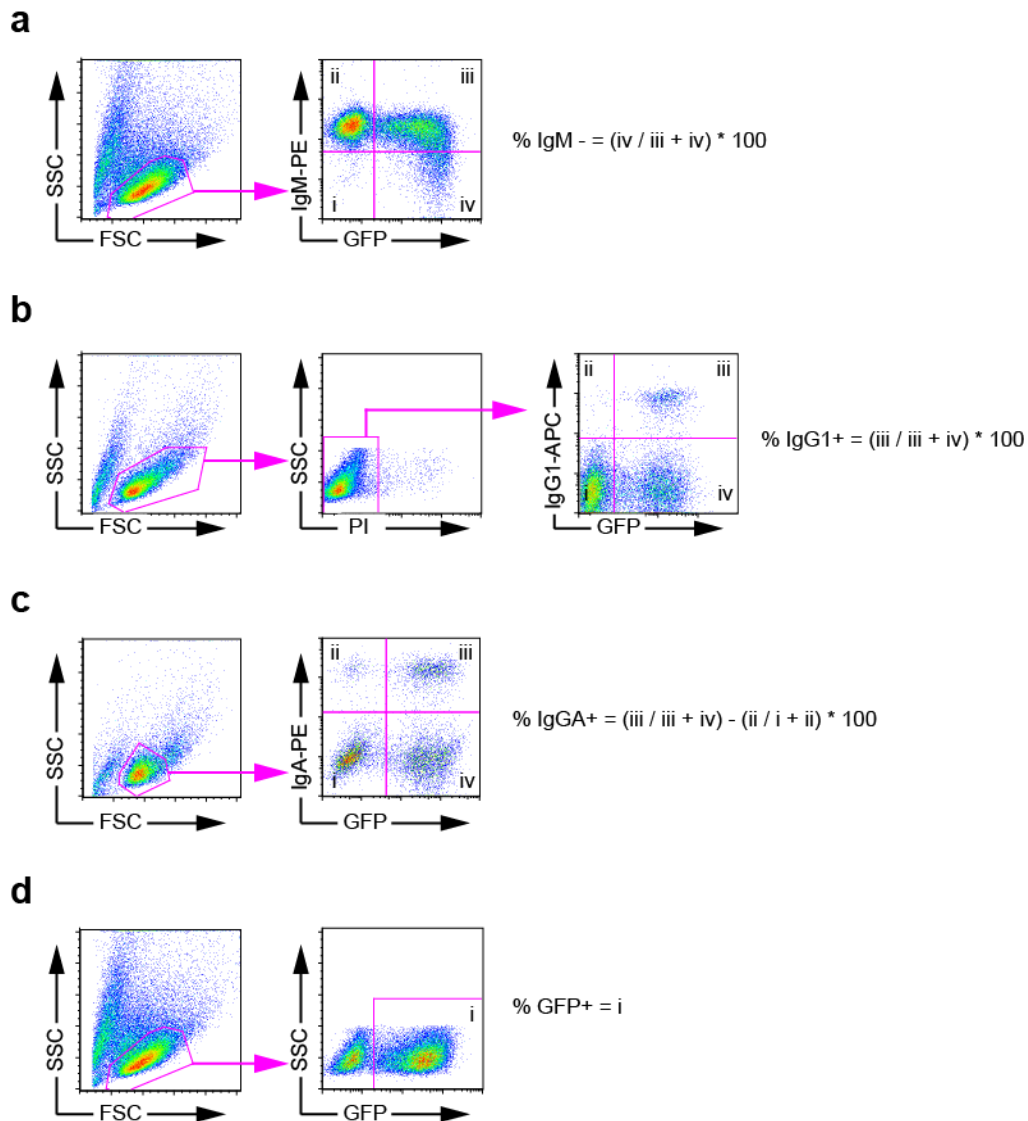

**Supplementary Figure S8. Diagram of flow cytometry gating strategies.**

Schemes of gating strategies used in various flow cytometry analysis. Magenta arrows demonstrate gates that were further dissected. Roman numerals indicate gates used for analysis, with example calculations indicated on the right. **(a)** Strategy for measuring CSR in primary B cells, used in Fig. 1d, Fig. 6a, b, Supplementary Fig. 1c, Supplementary Fig. 2c. **(b)** Strategy for measuring CSR in CH12 B cells, used in Fig. 3d. **(c)** Strategy for measuring SHM in DT40 B cells, used in Fig. 1c, Fig. 3e, Fig. 8e, Supplementary Fig. 1d and Supplementary Fig. 2b. **(d)** Strategy used for measuring GFP levels in CH12 and DT40 B cells, used in Fig. 3b, f, and Fig. 8c.

Supplementary table 1 - AID BioID interactions reduced in the R mutants according to 4 different methods

| Geneid | Statistical method* |   |   |   | P-value**** | Total | genename | Functional category  | Function                                                | Spectral counts (s.c.) |      |       |       |       | s.c. sum |       |       |      |
|--------|---------------------|---|---|---|-------------|-------|----------|----------------------|---------------------------------------------------------|------------------------|------|-------|-------|-------|----------|-------|-------|------|
|        | 1                   | 2 | 3 | 4 |             |       |          |                      |                                                         | aid2                   | aid1 | m1712 | m1711 | m1782 | m1781    | aid   | m171  | m178 |
| 108723 | 1                   | 1 | 1 | 1 | 9.59E-02    | 4     | Card11   | Signaling            | BCR signaling                                           | 23                     | 18   | 6     | 5     | 7     | 2        | 20.5  | 5.5   | 4.5  |
| 15163  | 1                   | 1 | 1 | 1 | 3.76E-08    | 4     | Hcls1    | Signaling            | BCR signaling                                           | 116                    | 119  | 27    | 41    | 21    | 29       | 117.5 | 34    | 25   |
| 17060  | 1                   | 1 | 1 | 1 | 1.16E-03    | 4     | Blnk     | Signaling            | BCR signaling                                           | 16                     | 15   | 1     | 0     | 0     | 0        | 15.5  | 0.5   | 0    |
| 192119 | 1                   | 1 | 1 | 1 | 9.63E-02    | 4     | Dicer1   | RNA processing       | Translation silencing                                   | 9                      | 9    | 0     | 1     | 0     | 0        | 9     | 0.5   | 0    |
| 20926  | 1                   | 1 | 1 | 1 | 2.47E-02    | 4     | Supt6    | Chromatin associated | Histone chaperone / transcription elongation            | 494                    | 482  | 142   | 197   | 71    | 64       | 488   | 169.5 | 67.5 |
| 223691 | 1                   | 1 | 1 | 1 | 1.16E-03    | 4     | Eif3l    | Translation          | Translation initiation                                  | 37                     | 42   | 9     | 9     | 7     | 12       | 39.5  | 9     | 9.5  |
| 227648 | 1                   | 1 | 1 | 1 | 2.12E-02    | 4     | Sec16a   | Protein transport    | Protein transport                                       | 20                     | 25   | 3     | 7     | 4     | 4        | 22.5  | 5     | 4    |
| 23970  | 1                   | 1 | 1 | 1 | 6.26E-15    | 4     | Pacs1n2  | Signaling            | Signaling                                               | 49                     | 47   | 0     | 0     | 0     | 0        | 48    | 0     | 0    |
| 17955  | 1                   | 1 | 1 | 1 | 5.17E-02    | 3     | Nap114   | Chromatin associated | Histone chaperone / transcription elongation            | 24                     | 21   | 6     | 6     | 5     | 6        | 22.5  | 6     | 5.5  |
| 217337 | 1                   | 1 | 1 | 1 | 5.06E-03    | 3     | Srp68    | Protein transport    | Protein transport                                       | 50                     | 64   | 25    | 18    | 15    | 21       | 57    | 21.5  | 18   |
| 217869 | 1                   | 1 | 1 | 1 | 1.69E-04    | 3     | Eif5     | Translation          | Translation initiation / mRNA transport                 | 69                     | 90   | 18    | 27    | 32    | 21       | 79.5  | 22.5  | 26.5 |
| 67154  | 1                   | 1 | 1 | 1 | 5.39E-03    | 3     | Mtdh     | Signaling            | Signaling                                               | 44                     | 39   | 11    | 7     | 15    | 14       | 41.5  | 9     | 14.5 |
| 13544  | 1                   | 1 | 1 | 1 |             | 3     | Dvl3     | Signaling            | Signaling                                               | 78                     | 21   | 0     | 15    | 2     | 12       | 49.5  | 7.5   | 7    |
| 17535  | 1                   | 1 | 1 | 1 |             | 3     | Mre11a   | Chromatin associated | DNA damage response                                     | 11                     | 13   | 3     | 2     | 0     | 0        | 12    | 2.5   | 0    |
| 19069  | 1                   | 1 | 1 | 1 |             | 3     | Nup88    | Chromatin associated | Nuclear pore / mRNA transport / Transcription silencing | 7                      | 10   | 2     | 3     | 0     | 0        | 8.5   | 2.5   | 0    |
| 230721 | 1                   | 1 | 1 | 1 |             | 3     | Pabpc4   | RNA processing       | mRNA transport                                          | 22                     | 22   | 10    | 4     | 0     | 2        | 22    | 7     | 1    |
| 353258 | 1                   | 1 | 1 | 1 |             | 3     | Ltv1     | Other                | Ribosome biogenesis / rRNA processing                   | 9                      | 5    | 1     | 1     | 0     | 0        | 7     | 1     | 0    |
| 110611 |                     |   | 1 | 1 | 5.11E-02    | 2     | Hdlbp    | Chromatin associated | RNA binding protein / heterochromatin formation         | 30                     | 29   | 12    | 6     | 3     | 13       | 29.5  | 9     | 8    |
| 13669  |                     |   | 1 | 1 | 7.67E-05    | 2     | Eif3a    | Translation          | Translation initiation                                  | 113                    | 91   | 28    | 31    | 43    | 42       | 102   | 29.5  | 42.5 |
| 226594 |                     |   | 1 | 1 | 1.95E-02    | 2     | Rcsd1    | Other                | Actin remodeling                                        | 42                     | 45   | 13    | 18    | 17    | 13       | 43.5  | 15.5  | 15   |
| 56347  |                     |   | 1 | 1 | 2.12E-02    | 2     | Eif3c    | Translation          | Translation initiation / mRNA transport                 | 57                     | 62   | 29    | 30    | 12    | 21       | 59.5  | 29.5  | 16.5 |
| 75705  |                     |   | 1 | 1 | 3.34E-02    | 2     | Eif4b    | Translation          | Translation initiation / mRNA transport                 | 50                     | 60   | 12    | 13    | 22    | 37       | 55    | 12.5  | 29.5 |
| 110355 | 1                   | 1 |   |   |             | 2     | Adrbk1   | Signaling            | Signaling                                               | 4                      | 6    | 0     | 0     | 0     | 0        | 5     | 0     | 0    |
| 16341  | 1                   |   | 1 |   |             | 2     | Eif3e    | Translation          | Translation initiation                                  | 26                     | 29   | 6     | 13    | 11    | 10       | 27.5  | 9.5   | 10.5 |
| 20383  |                     | 1 | 1 |   |             | 2     | Srsf3    | RNA processing       | Splicing / mRNA export                                  | 8                      | 10   | 0     | 1     | 3     | 2        | 9     | 0.5   | 2.5  |
| 224742 | 1                   |   | 1 |   |             | 2     | Abcf1    | Translation          | Translation initiation                                  | 13                     | 20   | 3     | 0     | 6     | 7        | 16.5  | 1.5   | 6.5  |
| 320528 | 1                   | 1 |   |   |             | 2     | Vps13c   | Other                | mitochondrial maintenance                               | 9                      | 3    | 2     | 0     | 0     | 0        | 6     | 1     | 0    |
| 58194  |                     | 1 | 1 |   |             | 2     | Sh3kbp1  | Signaling            | Signaling                                               | 6                      | 9    | 0     | 0     | 0     | 0        | 7.5   | 0     | 0    |
| 74112  | 1                   | 1 |   |   |             | 2     | Usp16    | Chromatin associated | H2A de-ubiquitinase / transcription elongation          | 2                      | 9    | 0     | 0     | 2     | 1        | 5.5   | 0     | 1.5  |
| 17886  |                     |   |   | 1 | 1.16E-03    | 1     | Myh9     | Other                | Cytoskeleton                                            | 142                    | 135  | 66    | 69    | 62    | 78       | 138.5 | 67.5  | 70   |
| 208643 |                     |   |   | 1 | 1.60E-02    | 1     | Eif4g1   | Translation          | Translation initiation / mRNA transport                 | 139                    | 118  | 50    | 72    | 69    | 84       | 128.5 | 61    | 76.5 |
| 226562 |                     |   |   | 1 | 1.06E-04    | 1     | Prrc2c   | Other                | Unknown                                                 | 200                    | 169  | 97    | 91    | 69    | 79       | 184.5 | 94    | 74   |
| 27979  |                     |   |   | 1 | 6.57E-02    | 1     | Eif3b    | Translation          | Translation initiation                                  | 52                     | 62   | 23    | 22    | 34    | 25       | 57    | 22.5  | 29.5 |
| 73158  |                     |   |   | 1 | 1.43E-02    | 1     | Larp1    | Translation          | Translation initiation                                  | 107                    | 91   | 45    | 50    | 41    | 62       | 99    | 47.5  | 51.5 |
| 103963 | 1                   |   |   |   |             | 1     | Rpn1     | Other                | N-oligosaccharyl transferase / Proteasome               | 14                     | 9    | 0     | 3     | 5     | 3        | 11.5  | 1.5   | 4    |
| 107951 | 1                   |   |   |   |             | 1     | Cdk9     | Chromatin associated | Transcription elongation / cyclin dependent kinase      | 15                     | 10   | 2     | 3     | 2     | 8        | 12.5  | 2.5   | 5    |
| 19192  |                     |   | 1 |   |             | 1     | Psme3    | Other                | Proteasome                                              | 43                     | 43   | 32    | 31    | 3     | 4        | 43    | 31.5  | 3.5  |
| 213988 | 1                   |   |   |   |             | 1     | Tnrc6b   | RNA processing       | Translation silencing                                   | 7                      | 7    | 3     | 2     | 2     | 3        | 7     | 2.5   | 2.5  |
| 218973 |                     |   | 1 |   |             | 1     | Wdhd1    | Chromatin associated | Replication initiation                                  | 12                     | 17   | 2     | 0     | 0     | 11       | 14.5  | 1     | 5.5  |
| 236732 |                     | 1 |   |   |             | 1     | Rbm10    | RNA processing       | Splicing                                                | 5                      | 5    | 0     | 0     | 0     | 1        | 5     | 0     | 0.5  |
| 27984  |                     | 1 |   |   |             | 1     | Efh2     | Other                | Clacium binding                                         | 9                      | 3    | 0     | 0     | 0     | 2        | 6     | 0     | 1    |
| 319322 |                     | 1 |   |   |             | 1     | Sf3b2    | RNA processing       | Splicing                                                | 6                      | 4    | 0     | 0     | 0     | 0        | 5     | 0     | 0    |
| 56440  |                     |   | 1 |   |             | 1     | Snx1     | Protein transport    | Protein transport                                       | 20                     | 32   | 4     | 0     | 7     | 19       | 26    | 2     | 13   |
| 59021  | 1                   |   |   |   |             | 1     | Rab2a    | Protein transport    | Protein transport                                       | 7                      | 6    | 0     | 2     | 2     | 2        | 6.5   | 1     | 2    |
| 66085  |                     |   | 1 |   |             | 1     | Eif3f    | Translation          | Translation initiation                                  | 45                     | 55   | 26    | 11    | 30    | 20       | 50    | 18.5  | 25   |
| 66448  | 1                   |   |   |   |             | 1     | Mrpl20   | Other                | Mitochondrial ribosome                                  | 6                      | 4    | 4     | 0     | 0     | 0        | 5     | 2     | 0    |
| 67062  | 1                   |   |   |   |             | 1     | Slc25a53 | Protein transport    | Mitochondrial transport                                 | 5                      | 5    | 0     | 1     | 4     | 0        | 5     | 0.5   | 2    |
| 67166  | 1                   |   |   |   |             | 1     | Arl8b    | Signaling            | GTPase                                                  | 6                      | 4    | 3     | 1     | 2     | 2        | 5     | 2     | 2    |
| 67543  | 1                   |   |   |   |             | 1     | Pabpc6   | RNA processing       | mRNA transport                                          | 30                     | 35   | 0     | 26    | 23    | 0        | 32.5  | 13    | 11.5 |
| 68926  | 1                   |   |   |   |             | 1     | Ubap2    | Other                | Protein ubiquitination                                  | 14                     | 11   | 1     | 9     | 4     | 0        | 12.5  | 5     | 2    |
| 69710  |                     | 1 |   |   |             | 1     | Arap1    | Protein transport    | Protein transport                                       | 4                      | 7    | 0     | 0     | 0     | 0        | 5.5   | 0     | 0    |
| 72567  |                     | 1 |   |   |             | 1     | Bclaf1   | Chromatin associated | Transcriptional repressor                               | 5                      | 6    | 0     | 0     | 0     | 0        | 5.5   | 0     | 0    |
| 75786  |                     | 1 |   |   |             | 1     | Ckap5    | Other                | Cytoskeleton                                            | 6                      | 8    | 0     | 0     | 0     | 3        | 7     | 0     | 1.5  |
| 76302  |                     | 1 |   |   |             | 1     | Pcnp     | Other                | Cell cycle                                              | 6                      | 6    | 2     | 2     | 0     | 0        | 6     | 2     | 0    |

\* Preys enriched by >2.5 fold s.c. in AID over R-muts average AND 5-fold over APOBEC2 s.c. for the same prey

\*\* Preys with Z-score >2 were considered differential interactions.

\*\*\* Preys with local Z-score >2 over a sliding window including 10% of the points around the candidate were considered differential interactions.

\*\*\*\* P-values calculated from negative binomial distributions of the data.

Supplementary table 2 - Oligonucleotides

| ChIPs in mouse splenic B cells |                                          |            |                                                          |                      |
|--------------------------------|------------------------------------------|------------|----------------------------------------------------------|----------------------|
| Amplicon name                  | Target site                              |            | Sequence                                                 | Reference            |
| P-a                            | Sμ TSS a                                 | fwd<br>rev | CCACCTGGGTAATTTGCATTTC<br>GGGAAACTAGAACTACTCAAGCTAA      | This study           |
| P-b                            | Sμ TSS b                                 | fwd<br>rev | AGCTTGAGTAGTTCTAGTTTCCC<br>GAGACCAATAATCAGAGGGAAGAA      | This study           |
| Sμ-a                           | Sμ upstream from repeats                 | fwd<br>rev | TAGTAAGCGAGGCTCTAAAAAGCAC<br>ACTCAGAGAAGCCCAACCCAT       | Cortizas et al. 2013 |
| Sμ-b                           | Sμ downstream from repeats               | fwd<br>rev | GGTTGGGAGACCATGAATTG<br>TTCTTAGCTCAACCCAGTTTATCC         | Cortizas et al. 2013 |
| Cμ                             | Cμ                                       | fwd<br>rev | CTGAACCTGAGGGAGTCCAGC<br>GCCACTGCACACTGATGTCT            | Cortizas et al. 2013 |
| P                              | Sy1 TSS                                  | fwd<br>rev | GCTGCAAGAAGAGGCCATAC<br>CTCCTTCCCAATCTCCCGTG             | This study           |
| Sy1-a                          | Sy1 upstream from repeats                | fwd<br>rev | GAGGAGTGCAGGAAGTCTGG<br>CCTTGATGCCCTCCCTTT               | This study           |
| Sy1-b                          | Sy1 downstream from repeats              | fwd<br>rev | GGATGTCTAGGCTGGAGCTG<br>GAAGCTCAGGCCTGTTGCTG             | This study           |
| Sα1-a                          | Sα upstream from repeats                 | fwd<br>rev | AAGCAGGCCTGGGGTGGAACA<br>AGCAAGCTCAGCCAGCCTAA            | This study           |
| Sα1-b                          | Sα downstream from repeats               | fwd<br>rev | CTTGGCTAGGCTACAATGGATTGAGC<br>GTGCAACTCTATCTAGGCTGCCCGGT | Cortizas et al. 2013 |
| Gapdh                          | <i>Gapdh</i> ~2.5 Kb downstream from TSS | fwd<br>rev | CACCTTCAGCTTTCCGGCCACTTAC<br>GGAAGCCCATCACCATCTCCAGGA    | Cortizas et al. 2013 |
| P                              | <i>Gapdh</i> TSS                         | fwd<br>rev | GAGCTACGTGCACCCGTAAA<br>AATGAGGCGGGTCCAAGAG              | This study           |
| P                              | <i>Ii4ra</i> TSS                         | fwd<br>rev | CCGCAGTCGTGGGACTTAAA<br>CAGCTCATTTTACCCCGCAG             | This study           |
| Ii4ra 500bp                    | <i>Ii4ra</i> 500bp downstream from TSS   | fwd<br>rev | AGTCTGTGATTCCGTCTGCC<br>CCACATTGAGCCTCACACCT             | This study           |
| Ii4ra 800bp                    | <i>Ii4ra</i> 800bp downstream from TSS   | fwd<br>rev | GACAGGGAGTGATTGGGCA<br>GTTCTCCACACCCCAAACT               | This study           |

| ChIPs in DT40 cells |                               |            |                                                |                       |
|---------------------|-------------------------------|------------|------------------------------------------------|-----------------------|
| Amplicon name       | Target site                   |            | Sequence                                       | Reference             |
| P                   | IgV TSS                       | fwd<br>rev | CGGAAGGACGCGGGTATAAA<br>ACCAGGCGCAACGAGTAC     | Romanello et al. 2016 |
| IgVλ                | IgV 400bp downstream from TSS | fwd<br>rev | CCCTTCACGATTCTCCGGTT<br>GTCAGCGACTCACCTAGGAC   | Romanello et al. 2016 |
| intron              | IgV intron                    | fwd<br>rev | TGGTCTCTCACTGGGACTC<br>GCACTTACCTGGACAGCTGA    | Romanello et al. 2016 |
| GAPDH               | DT40 <i>GAPDH</i>             | fwd<br>rev | TGTTTGTGATGGGTGTCAAC<br>GCATTGCTGGGAAAGAAAGAAG | Romanello et al. 2016 |

| Primers used for sequencing mutations |                            |            |                                                                    |                                |
|---------------------------------------|----------------------------|------------|--------------------------------------------------------------------|--------------------------------|
| Figure                                | Target site                |            | Sequence                                                           | Reference                      |
| Fig. 3a                               | Sμ TSS to S region (mouse) | fwd<br>rev | AGCTTGAGTAGTTCTAGTTTCCC<br>CAGTCCAGTGTAGGCAGTAGA                   | This study<br>Zahn et al. 2014 |
| Fig. 8f                               | IgVλ (DT40)                | fwd<br>rev | CAGGAGCTCGCGGGCCGTCAGTATTGCCG<br>GCGCAAGCTTCCCCAGCCTGCCGCAAGTCCAAG | Sale et al. 2001               |
| Fig. 8g                               | Sμ S region (mouse)        | fwd<br>rev | GTAAGGAGGGACCCAGGCTAAG<br>CAGTCCAGTGTAGGCAGTAGA                    | Zahn et al. 2014               |

| Quickchange primers |           |            |                                                                                                  |                  |
|---------------------|-----------|------------|--------------------------------------------------------------------------------------------------|------------------|
| Mutation            | Protein   |            | Sequence                                                                                         | Reference        |
| R171Y               | human AID | fwd<br>rev | GAAGGGCTGCATGAAAATTCAGTTTATCTCTCCAGACAGCTT<br>AAGCTGTCTGGAGAGATAAACTGAATTTTCATGCAGCCCTTC         | This study       |
| S173E               | human AID | fwd<br>rev | CATGAAAATTCAGTTCGTCTCGAGAGACAGCTTCGGCGCATCCTT<br>AAGGATGCGCCGAAGCTGTCTCTCGAGACGAACTGAATTTTCATG   | This study       |
| R174E               | human AID | fwd<br>rev | GAAAATTCAGTTCGTCTCTCCGAGCAGCTTCGGCGCATCCTTTTG<br>CAAAAGGATGCGCCGAAGCTGCTCGGAGAGACGAACTGAATTTTC   | This study       |
| R177A               | human AID | fwd<br>rev | GTTCTGTCTCCAGACAGCTTCGCGCATCCTTT<br>AAAGGATGCGCGCAAGCTGTCTGGAGAGACGAAC                           | This study       |
| R178D               | human AID | fwd<br>rev | CTCCAGACAGCTTCGGGACATCCTTTTGCCCTG<br>CAGGGCAAAAGGATGTCGGAAGCTGTCTGGAG                            | This study       |
| R171K               | human AID | fwd<br>rev | CTGGGAAGGGCTGCATGAAAATTCAGTTAAGCTCTCCAGACAGCTT<br>AAGCTGTCTGGAGAGCTTAACTGAATTTTCATGCAGCCCTTCCCAG | This study       |
| R174K               | human AID | fwd<br>rev | CAGTTCGTCTCTCCAACAGCTTCGGCGC<br>GCGCCGAAGCTGTTGGAGAGACGAACTG                                     | This study       |
| R178K               | human AID | fwd<br>rev | CATACAGGGGCAAAAGGATCTTCCGAAGCTGTCTGGAGAGA<br>TCTCTCCAGACAGCTTCGGAAGATCCTTTTGCCCTGTATG            | This study       |
| E58A                | human AID | fwd<br>rev | CGGCTGCCACGTGGCATTGCTCTTCCCTCCG<br>CGGAGGAAAGCAATGCCACGTGGCAGCCG                                 | Zahn et al. 2014 |
| R171Y               | mouse AID | fwd<br>rev | GCGCCGAAGTTGTCTGGTTAGATAGACAGAATTTTCATGTAGCCC<br>GGGCTACATGAAAATTCGTCTATCTAACCCAGACAACCTTCGGCGC  | This study       |
| R174E               | mouse AID | fwd<br>rev | CAAAAGGATGCGCCGAAGTGTCTCGGTTAGCCGGACGAAATTTTC<br>GAAAATTCGTCTCCGGTAACCGAGCAACTTCGGCGCATCCTTTTG   | This study       |
| R178D               | mouse AID | fwd<br>rev | GTACAAGGGCAAAAGGATGTCGCAAGTTGTCTGGTTAGC<br>GCTAACCCAGACAACCTTCGGGACATCCTTTTGCCCTGTAC             | This study       |

Supplementary table 2 - Oligonucleotides (Cont.)

| Cloning primers (restriction sites removed)                  |                   |           |                                                                           |            |
|--------------------------------------------------------------|-------------------|-----------|---------------------------------------------------------------------------|------------|
| Construct                                                    | Protein           |           | Sequence                                                                  |            |
| AID                                                          | human AID         | fwd       | ATGGACAGCCTCTTGATGAA                                                      | This study |
|                                                              |                   | rev       | TCAAAGTCCCAAAGTACGAAA                                                     |            |
| AIDΔE5                                                       | human AIDΔE5      | fwd       | ATGGACAGCCTCTTGATGAA                                                      | This study |
|                                                              |                   | rev       | TCACAAAAGGATGCGCCGAAG                                                     |            |
| AIDΔE5-R178D                                                 | human AIDΔE5      | fwd       | ATGGACAGCCTCTTGATGAA                                                      | This study |
|                                                              |                   | rev       | CTACAAAAGGATGTCCCGAAGCTGTCTGGAGAGACG                                      |            |
| AID                                                          | mouse AID         | fwd       | ATGGACAGCCTCTTGATGAA                                                      | This study |
|                                                              |                   | rev       | TCAAATCCCAACATACGAAATGCA                                                  |            |
| Gateway cloning primers (Recombination sequences underlined) |                   |           |                                                                           |            |
| Construct                                                    | Protein           |           | Sequence                                                                  |            |
| acR-mCherry-NLS-SPT                                          | human SPT5        | fwd       | GGGG <u>CAAGTTTGTACAAAAAGCAGGCTTC</u> ATGTGGACAGCGAGGACAG                 | This study |
|                                                              |                   | rev       | GGGG <u>CCACTTTTGTACAAGAAAGCTGGGTTC</u> TAGGCTTCCAGGAGCTTCCCA             |            |
| AID-Linker-BirA*-flag                                        | mouse AID         | fwd       | GGGG <u>CAAGTTTGTACAAAAAGCAGGCTTC</u> ACCATGGACAGCCTTCTGTGAAGCA           | This study |
|                                                              |                   | rev       | GGGG <u>CAACTTTTGTATACAAAGTTGTA</u> AAATCCCAACATACGAAATGCATCT             |            |
| AID-Linker-BirA*-flag                                        | Linker            | fwd       | GGGG <u>CAACTTTTGTATACAAAGTTGTA</u> <b>GGTGGCGGAGGGAGTGGAGGCGGTGGCAGC</b> | This study |
| AID-Linker-BirA*-flag                                        | Linker-BirA*-flag | fwd       | <b>TGGAGGCGGTGGCAGCGGTGGCGGAGGGAGT</b> ATGAAGGACAACACCGTGCC               |            |
|                                                              |                   | rev       | GGGG <u>CCACTTTTGTACAAGAAAGCTGGGTTC</u> TATTTATCGTCATCGTCTTTGTAGTCT       |            |
| APOBEC2-BirA*-flag                                           | human APOBEC2     | fwd       | GGGG <u>CAAGTTTGTACAAAAAGCAGGCTTC</u> ATGGCCAGAAGGAAGAGGCT                | This study |
|                                                              |                   | rev       | GGGGCAACTTTTGTATACAAAGTTGTCTTCAGGATGTCTGCCAATTCT                          |            |
| APOBEC2-BirA*-flag                                           | BirA*-flag        | fwd       | GGGG <u>CAACTTTTGTATACAAAGTTGTA</u> AATGAAGGACAACACCGTGCC                 | This study |
|                                                              |                   | rev       | GGGG <u>CCACTTTTGTACAAGAAAGCTGGGTTC</u> TATTTATCGTCATCGTCTTTGTAGTCT       |            |
| Modular AID fusion constructs (restriction sites underlined) |                   |           |                                                                           |            |
| Construct                                                    | Protein           |           | Sequence                                                                  |            |
| AID-linker-AID(E58A)                                         | N-term human AID  | fwd       | nn <u>GGATCC</u> accATGGACAGCCTCTTGATGAA                                  | This study |
|                                                              |                   | rev       | c <u>GAATTC</u> ccAAGTCCCAAAGTACGAAATGC                                   |            |
| AID-linker-AID(E58A)                                         | Linker            | sense     | <u>AATTCGGTGGCGGAGGGAGTGGAGGCGGTGGCAGCGGTGGCGGAGGGAGT</u> <b>A</b>        | This study |
|                                                              |                   | antisense | <u>AGCTTACTCCCTCGCCACCGGTGCCACCGCTCCACTCCCTCCGCCACCG</u> <b>G</b>         |            |
| AID-linker-AID(E58A)                                         | C-term human AID  | fwd       | nnn <u>AAGCTT</u> ATGGACAGCCTCTTGATGAA                                    | This study |
|                                                              |                   | rev       | nnn <u>CTCGAGT</u> CAAAGTCCCAAAGTACGAAA                                   |            |

### Supplementary references

1. Cortizas, E.M. et al. Alternative End-Joining and Classical Nonhomologous End-Joining Pathways Repair Different Types of Double-Strand Breaks during Class-Switch Recombination. *J Immunol* **191**, 5751-63 (2013).
2. Romanello, M., Schiavone, D., Frey, A. & Sale, J.E. Histone H3.3 promotes IgV gene diversification by enhancing formation of AID-accessible single-stranded DNA. *The EMBO journal* **35**, 1452-1464 (2016).
3. Zahn, A. et al. Activation induced deaminase C-terminal domain links DNA breaks to end protection and repair during class switch recombination. *Proceedings of the National Academy of Sciences of the United States of America* **111**, E988-97 (2014).
4. Sale, J.E., Calandrini, D.M., Takata, M., Takeda, S. & Neuberger, M.S. Ablation of XRCC2/3 transforms immunoglobulin V gene conversion into somatic hypermutation. *Nature* **412**, 921-6 (2001).
